# Supplementary material for: Identification of a Complex Karyotype Signature with Clinical Implications in AML and MDS-EB Using Gene Expression Profiling
Source: MDPI journal article supplement (doi:10.3390/cancers15215289), 2023-11-04
Supplement: s1 [file s1]

**Table S6.** Patient characteristic of the BeatAML cohort evaluated for clinical significance of complex karyotype.

|                                        | <b>Total (n=120)</b> | <b>CK (n=22)</b>  | <b>Non-CK (n=98)</b> | <b>P</b>     |
|----------------------------------------|----------------------|-------------------|----------------------|--------------|
| Sex (%)                                |                      |                   |                      | 0.736        |
| Male                                   | 72 (60.0)            | 12 (54.5)         | 60 (61.2)            |              |
| Female                                 | 48 (40.0)            | 10 (45.5)         | 38 (38.8)            |              |
| Age (years)                            |                      |                   |                      | 0.620        |
| Median (range)                         | 61.0 (10.0-87.0)     | 63.0 (23.0-83.0)  | 61.0 (10.0-87.0)     |              |
| Hb (g/dL)                              |                      |                   |                      | 0.095        |
| Median (range)                         | 8.6 (3.7-16.1)       | 8.2 (5.7-11.0)    | 8.8 (3.7-16.1)       |              |
| WBC count ( × 10 <sup>9</sup> /L)      |                      |                   |                      | <b>0.044</b> |
| Median (range)                         | 20.8 (0.5-427.46)    | 9.3 (0.5-119.6)   | 22.9 (0.9-427.46)    |              |
| Platelet count ( × 10 <sup>9</sup> /L) |                      |                   |                      | 0.386        |
| Median (range)                         | 47.0 (11.0-330.0)    | 33.0 (11.0-174.0) | 47.0 (12.0-330.0)    |              |
| BM blasts (%)                          |                      |                   |                      | <b>0.014</b> |
| Median (range)                         | 65.0 (1.0-95.0)      | 45.0 (3.0-95.0)   | 72.2 (1.0-95.0)      |              |
| Risk stratification by 2022 ELN        |                      |                   |                      | <b>0.000</b> |
| Favorable                              | 25 (20.8)            | 0 (0.0)           | 25 (25.5)            |              |
| Intermediate                           | 32 (26.7)            | 0 (0.0)           | 32 (32.7)            |              |
| Adverse                                | 55 (45.8)            | 22 (100.0)        | 33 (33.7)            |              |
| Not assessed                           | 8 (6.7)              | 0 (0.0)           | 8 (8.2)              |              |
| Risk stratification by genetics        |                      |                   |                      |              |
| <i>FLT3-ITD</i>                        |                      |                   |                      | 0.108        |
| <i>without</i>                         | 88 (73.3)            | 20 (90.9)         | 68 (69.4)            |              |
| <i>with</i>                            | 23 (19.2)            | 1 ( 4.5)          | 22 (22.4)            |              |
| <i>NA</i>                              | 9 (7.5)              | 1 ( 4.5)          | 8 ( 8.2)             |              |
| mutated <i>RUNX1</i>                   |                      |                   |                      | 0.653        |
| <i>without</i>                         | 95 (79.2)            | 19 (86.4)         | 76 (77.6)            |              |
| <i>with</i>                            | 16 (13.3)            | 2 ( 9.1)          | 14 (14.3)            |              |
| <i>NA</i>                              | 9 (7.5)              | 1 ( 4.5)          | 8 ( 8.2)             |              |
| Overall survival (months)              |                      |                   |                      | 0.191        |
| Median (range)                         | 7.3 (0.07-45.92)     | 7.1 (0.43-40.69)  | 10.0 ( 0.07-45.92)   |              |

*AML* Acute myeloid leukemia, *Hb* Hemoglobin, *WBC* White blood cell, *BM* Bone marrow, *ITD* Internal tandem duplication, *NA* Not applicable.
