# Supplementary material for: Identification of a Complex Karyotype Signature with Clinical Implications in AML and MDS-EB Using Gene Expression Profiling
Source: MDPI journal article supplement (doi:10.3390/cancers15215289), 2023-11-04
Supplement: s1 [file s1]

**Table S3.** Pathways identified in overrepresentation analysis.

| Pathway                                                                        | Set size | Candidates Contained | <i>p</i> -value | <i>q</i> -value | Pathway source | Members Input Overlap                                                                                                                                                                                                                     |
|--------------------------------------------------------------------------------|----------|----------------------|-----------------|-----------------|----------------|-------------------------------------------------------------------------------------------------------------------------------------------------------------------------------------------------------------------------------------------|
| Nonsense-Mediated Decay (NMD)                                                  | 117      | 17 (14.5%)           | <0.0001         | <0.0001         | Reactome       | <i>RPL22L1; RPS27; RPS10; RPS23; RPS27L; RPL39; RPL27; RPL26; RPL35A; RPL23; RPL15; RPL17; RPS14; RPL12; RPS4X; RPL38; RPL34 RPS27; RPS10; RPS23; RPL38; RPL39; RPL34; RPL26; RPL35A; RPL23; RPL15; RPL17; RPS14; RPL12; RPS4X; RPL27</i> |
| Cytoplasmic Ribosomal Proteins                                                 | 88       | 15 (17.0%)           | <0.0001         | <0.0001         | Wikipathways   | <i>RPL22L1; RPS27; RPS10; RPS23; RPL38; RPL39; RPL27; RPL26; RPL35A; RPL23; RPL15; RPL17; RPS14; RPL12; RPS4X; RPL34; RPS27L</i>                                                                                                          |
| Ribosome - Homo sapiens (human)                                                | 158      | 17 (10.8%)           | <0.0001         | <0.0001         | KEGG           | <i>RPL22L1; RPS27; RPS10; SEC11A; RPS23; RPS27L; RPL39; RPL27; RPL26; RPL35A; RPL23; RPL15; RPL17; RPS14; MRPS33; RPL12; RPS4X; RPL38; RPL34; HARS2</i>                                                                                   |
| Translation                                                                    | 307      | 20 (6.5%)            | <0.0001         | 0.0007          | Reactome       | <i>RPL22L1; RPS27; HNMT; RPS10; RPS23; RPS27L; RPL39; RPL27; RPL26; RPL35A; RPL23; RPL15; RPL17; RPS14; MRPS33; RPL12; RPS4X; RPL38; RPL34; HARS2</i>                                                                                     |
| Metabolism of amino acids and derivatives                                      | 339      | 21 (6.2%)            | <0.0001         | 0.0008          | Reactome       | <i>RPL22L1; RPS27; RPS10; RPS23; RPS27L; RPL39; RPL27; RPL26; RPL35A; RPL23; NQO1; RPL15; RPL17; RPS14; RPL12; RPS4X; RPL38; PYCR1; CKB; RPL34</i>                                                                                        |
| Mitotic Prometaphase                                                           | 192      | 14 (7.3%)            | 0.0001          | 0.0031          | Reactome       | <i>RPS27; NEK2; TUBG1; HAUS8; NUF2; BIRC5; CDCA5; CDC20; SKA1; NCAPH; BUB1; CDCA8; KIF2C; CKAP5</i>                                                                                                                                       |
| Regulation of cholesterol biosynthesis by SREBP (SREBF)                        | 31       | 5 (16.1%)            | 0.0006          | 0.0112          | Reactome       | <i>ELOVL6; SCD; SREBF2; SQLE; DHCR7</i>                                                                                                                                                                                                   |
| Integrin cell surface interactions                                             | 66       | 7 (10.6%)            | 0.0007          | 0.0125          | Reactome       | <i>JAM3; COL18A1; HSPG2; COL9A2; ICAM4; CDH1; ITGAE</i>                                                                                                                                                                                   |
| Heme Biosynthesis                                                              | 9        | 3 (33.3%)            | 0.0008          | 0.0153          | Wikipathways   | <i>UROD; HMBS; UROS</i>                                                                                                                                                                                                                   |
| Mitotic Spindle Checkpoint                                                     | 114      | 9 (7.9%)             | 0.0010          | 0.0182          | Reactome       | <i>RPS27; BUB1; NUF2; BIRC5; CDC20; SKA1; CDCA8; KIF2C; CKAP5</i>                                                                                                                                                                         |
| G2/M Transition                                                                | 138      | 10 (7.2%)            | 0.0011          | 0.0184          | Reactome       | <i>TPX2; OPTN; NEK2; HAUS8; GTSE1; TUBG1; FOXM1; AURKA; WEE1; CKAP5</i>                                                                                                                                                                   |
| Signaling by Rho GTPases, Miro GTPases and RHOTB3                              | 705      | 29 (4.1%)            | 0.0011          | 0.0186          | Reactome       | <i>MYH10; FGD5; CKB; BIRC5; FAM13B; CDC20; KIF2C; FARP1; SKA1; TIAM1; YWHAH; CDC42BPA; CDH1; CDCA8; NCKAP1; ARHGEF10; RPS27; BUB1; RAC3; NUF2; DAAM1; PKN3; SRC; TRIP10; PLEKHG4; VIM; SLC1A5; CKAP5; ARHGEF40</i>                        |
| Cellular responses to stress                                                   | 554      | 24 (4.3%)            | 0.0015          | 0.0221          | Reactome       | <i>RPS10; RPS27L; RPS14; RPL35A; FKBP4; RPL22L1; RPL27; RPL26; RPL23; FBXL17; RPS27; RPS23; HSPB1; SOD1; RPL15; COX4I1; TGS1; RPL12; RPS4X; RPL38; RPL39; RPL34; RPL17; TFDP1</i>                                                         |
| Gamma carboxylation, hypusine formation and arylsulfatase activation           | 41       | 5 (12.2%)            | 0.0021          | 0.0291          | Reactome       | <i>ARSD; PROS1; FN3K; TPST2; STS</i>                                                                                                                                                                                                      |
| Kinesins                                                                       | 43       | 5 (11.6%)            | 0.0026          | 0.0345          | Reactome       | <i>KIF27; KIF26B; KIF4A; KIF2C; KIF3C</i>                                                                                                                                                                                                 |
| Biosynthesis of unsaturated fatty acids - Homo sapiens (human)                 | 27       | 4 (14.8%)            | 0.0029          | 0.0362          | KEGG           | <i>ELOVL6; SCD; HSD17B4; ACOT7</i>                                                                                                                                                                                                        |
| SLC-mediated transmembrane transport                                           | 243      | 13 (5.3%)            | 0.0032          | 0.0405          | Reactome       | <i>SLC41A1; SLC38A5; SLC44A2; SLC2A9; SLC2A13; SLC2A1; SLC7A1; SLC26A2; SLC29A2; SLC1A5; SLC18A2; SLCO4A1; SLC43A1</i>                                                                                                                    |
| Heme biosynthesis                                                              | 14       | 3 (21.4%)            | 0.0033          | 0.0408          | Reactome       | <i>UROD; HMBS; UROS</i>                                                                                                                                                                                                                   |
| Cholesterol metabolism (includes both Bloch and Kandutsch-Russell pathways)    | 46       | 5 (10.9%)            | 0.0035          | 0.0408          | Wikipathways   | <i>SREBF2; SCD; ABCG1; SQLE; DHCR7</i>                                                                                                                                                                                                    |
| Apelin signaling pathway - Homo sapiens (human)                                | 137      | 9 (6.6%)             | 0.0036          | 0.0414          | KEGG           | <i>ACTA2; PLCB4; ADCY2; RYR3; PIK3CG; LIPE; MYL4; CDH1; ITPR3</i>                                                                                                                                                                         |
| Synthesis of PC                                                                | 29       | 4 (13.8%)            | 0.0037          | 0.0414          | Reactome       | <i>STARD10; ABHD3; SLC44A2; PCYT1B</i>                                                                                                                                                                                                    |
| Regulation of sister chromatid separation at the metaphase-anaphase transition | 15       | 3 (20.0%)            | 0.0041          | 0.0446          | Wikipathways   | <i>ESPL1; BUB1; CDC20</i>                                                                                                                                                                                                                 |
| Mitotic Anaphase                                                               | 195      | 11 (5.6%)            | 0.0044          | 0.0470          | Reactome       | <i>RPS27; BUB1; NUF2; BIRC5; CDC20; SKA1; ESPL1; CDCA5; CDCA8; KIF2C; CKAP5</i>                                                                                                                                                           |
| Golgi-to-ER retrograde transport                                               | 116      | 8 (6.9%)             | 0.0045          | 0.0470          | Reactome       | <i>TMED7; KIF27; KIF26B; COPG2; PAFAH1B3; KIF4A; KIF3C; KIF2C</i>                                                                                                                                                                         |
| Cell cycle                                                                     | 120      | 8 (6.7%)             | 0.0055          | 0.0546          | Wikipathways   | <i>BUB1; CDC20; YWHAH; ESPL1; WEE1; ORC1; TFDP1; CHEK1</i>                                                                                                                                                                                |
| Cell cycle - Homo sapiens                                                      | 124      | 8 (6.5%)             | 0.0066          | 0.0646          | KEGG           | <i>BUB1; ORC1; YWHAH; ESPL1; WEE1; CDC20; TFDP1; CHEK1</i>                                                                                                                                                                                |
| Oocyte meiosis - Homo sapiens                                                  | 129      | 8 (6.2%)             | 0.0084          | 0.0792          | KEGG           | <i>BUB1; ADCY2; YWHAH; CDC20; REC8; ESPL1; AURKA; ITPR3</i>                                                                                                                                                                               |

KEGG The Kyoto Encyclopedia of Genes and Genomes.
