# Supplementary material for: Identification of a Complex Karyotype Signature with Clinical Implications in AML and MDS-EB Using Gene Expression Profiling
Source: MDPI journal article supplement (doi:10.3390/cancers15215289), 2023-11-04
Supplement: s1 [file s1]

**Table S4.** List of discrepant cases in the prediction of CKS of karyotype with karyotype and microarray information.

| ID                     | Cohort  | Diagnosis | Karyotype                                                                                                                                                        | Microarray  | Karyotype group | CKS     |
|------------------------|---------|-----------|------------------------------------------------------------------------------------------------------------------------------------------------------------------|-------------|-----------------|---------|
| aml_ohsu_2018_14_00152 | BeatAML | AML       | 46,XY,add(8)(p21),t(8;19)(p11.2;q13.3)[18]/46,XY[2]                                                                                                              | NA          | Non-complex     | CKS     |
| aml_ohsu_2018_14_00774 | BeatAML | AML       | 46,XY[20]                                                                                                                                                        | NA          | Non-complex     | CKS     |
| aml_ohsu_2018_16_00145 | BeatAML | AML       | 46,XY,t(1;12)(p32;p13)[3]/46,XY[17]                                                                                                                              | NA          | Non-complex     | CKS     |
| TCGA-AB-2882           | TCGA    | AML       | 45,XX,-7[12]/46,XX[8]                                                                                                                                            | Non-complex | Non-complex     | CKS     |
| TCGA-AB-2814           | TCGA    | AML       | 46,XX,del(5)(q22q33)[4]/46,XX[16]                                                                                                                                | Non-complex | Non-complex     | CKS     |
| TCGA-AB-2938           | TCGA    | AML       | 45,X,-Y[3]/46,XY [17]                                                                                                                                            | Complex     | Non-complex     | CKS     |
| TCGA-AB-2987           | TCGA    | AML       | 46,XX[18]                                                                                                                                                        | Non-complex | Non-complex     | CKS     |
| K32                    | KUMC    | AML       | 46,XY,dup(1)(q23q32)[2]/46,XY[18]                                                                                                                                | NA          | Non-complex     | CKS     |
| aml_ohsu_2018_13_00393 | BeatAML | AML       | 89<4n>,XXY,-Y,-7,-12,+13,+13,-17,-21[2]/46,XY[18]                                                                                                                | NA          | Complex         | Non-CKS |
| aml_ohsu_2018_13_00522 | BeatAML | AML       | 46,XX,der(9)t(9;12)(p13;q13),del(11)(q21q25),der(12)add(12)(p11.2)add(12)(q13),del(13)(q14q22)[9]/46,idem,add(12)(q24.3),+13,-del(13)[9]/46,idem,add(17)(p13)[2] | NA          | Complex         | Non-CKS |
| aml_ohsu_2018_16_00048 | BeatAML | AML       | 46,XX,del(3)(p25),add(6)(p22),t(10;12)(p15;q13)[5]/46,XX[18]                                                                                                     | NA          | Complex         | Non-CKS |
| TCGA-AB-2849           | TCGA    | AML       | 47,XY,del(5)(q22q33),t(10;11)(p13~p15;q22~23),i(17)(q10)[3]/46,XY[17]                                                                                            | Non-complex | Complex         | Non-CKS |
| TCGA-AB-2949           | TCGA    | AML       | 47,XY,+22[10]/47,XY,+8[7]/45,XY,del(3)(p21),del(4)(p12p15),-7,?dup(7)(q11.2q36)[3]                                                                               | Non-complex | Complex         | Non-CKS |
| K46                    | KUMC    | AML       | 43,X,add(X)(q22),-5,-7,+11,der(11;15)(q10;q10),add(16)(q12),-17,-18,+mar[20]                                                                                     | NA          | Complex         | Non-CKS |

*AML* Acute myeloid leukemia, *TCGA* The Cancer Genome Atlas, *KUMC* Korea University Medical Center, *NA* Not applicable, *CKS* Complex karyotype signature.
