# Supplementary material for: Identification of a Complex Karyotype Signature with Clinical Implications in AML and MDS-EB Using Gene Expression Profiling
Source: MDPI journal article supplement (doi:10.3390/cancers15215289), 2023-11-04
Supplement: s1 [file s1]

**Table S2.** List of 404 differentially expressed genes.

| Gene              | Entrezgene | Name                                                    | HGNC       |
|-------------------|------------|---------------------------------------------------------|------------|
| <i>ABCB9</i>      | 23457      | ATP binding cassette subfamily B member 9               | HGNC:50    |
| <i>ABCG1</i>      | 9619       | ATP binding cassette subfamily G member 1               | HGNC:73    |
| <i>ABHD15</i>     | 116236     | abhydrolase domain containing 15                        | HGNC:26971 |
| <i>ABHD3</i>      | 171586     | abhydrolase domain containing 3, phospholipase          | HGNC:18718 |
| <i>ABLIM1</i>     | 3983       | actin binding LIM protein 1                             | HGNC:78    |
| <i>ACOT7</i>      | 11332      | acyl-CoA thioesterase 7                                 | HGNC:24157 |
| <i>ACTA2</i>      | 59         | actin alpha 2, smooth muscle                            | HGNC:130   |
| <i>ADCY2</i>      | 108        | adenylate cyclase 2                                     | HGNC:233   |
| <i>ADPRH</i>      | 141        | ADP-ribosylarginine hydrolase                           | HGNC:269   |
| <i>ADRB2</i>      | 154        | adrenoceptor beta 2                                     | HGNC:286   |
| <i>AIFM3</i>      | 150209     | apoptosis inducing factor mitochondria associated 3     | HGNC:26398 |
| <i>AK1</i>        | 203        | adenylate kinase 1                                      | HGNC:361   |
| <i>ALDH1L2</i>    | 160428     | aldehyde dehydrogenase 1 family member L2               | HGNC:26777 |
| <i>ANKRD36BP2</i> | 645784     | ankyrin repeat domain 36B pseudogene 2                  | HGNC:33607 |
| <i>ANO9</i>       | 338440     | anoctamin 9                                             | HGNC:20679 |
| <i>AQP1</i>       | 358        | aquaporin 1 (Colton blood group)                        | HGNC:633   |
| <i>ARHGEF10</i>   | 9639       | Rho guanine nucleotide exchange factor 10               | HGNC:14103 |
| <i>ARHGEF40</i>   | 55701      | Rho guanine nucleotide exchange factor 40               | HGNC:25516 |
| <i>ARSD</i>       | 414        | arylsulfatase D                                         | HGNC:717   |
| <i>ARTN</i>       | 9048       | artemin                                                 | HGNC:727   |
| <i>ARVCF</i>      | 421        | ARVCF delta catenin family member                       | HGNC:728   |
| <i>ATF7IP2</i>    | 80063      | activating transcription factor 7 interacting protein 2 | HGNC:20397 |
| <i>ATG12</i>      | 9140       | autophagy related 12                                    | HGNC:588   |
| <i>ATXN7L1</i>    | 222255     | ataxin 7 like 1                                         | HGNC:22210 |
| <i>AURKA</i>      | 6790       | aurora kinase A                                         | HGNC:11393 |

|                 |        |                                                               |            |
|-----------------|--------|---------------------------------------------------------------|------------|
| <i>BACE2</i>    | 25825  | beta-secretase 2                                              | HGNC:934   |
| <i>BBS2</i>     | 583    | Bardet-Biedl syndrome 2                                       | HGNC:967   |
| <i>BBS9</i>     | 27241  | Bardet-Biedl syndrome 9                                       | HGNC:30000 |
| <i>BIN1</i>     | 274    | bridging integrator 1                                         | HGNC:1052  |
| <i>BIRC5</i>    | 332    | baculoviral IAP repeat containing 5                           | HGNC:593   |
| <i>BTF3</i>     | 689    | basic transcription factor 3                                  | HGNC:1125  |
| <i>BUB1</i>     | 699    | BUB1 mitotic checkpoint serine/threonine kinase               | HGNC:1148  |
| <i>C16orf86</i> | 388284 | chromosome 16 open reading frame 86                           | HGNC:33755 |
| <i>C5orf15</i>  | 56951  | chromosome 5 open reading frame 15                            | HGNC:20656 |
| <i>CACNA2D4</i> | 93589  | calcium voltage-gated channel auxiliary subunit alpha2delta 4 | HGNC:20202 |
| <i>CALN1</i>    | 83698  | calneuron 1                                                   | HGNC:13248 |
| <i>CAMLG</i>    | 819    | calcium modulating ligand                                     | HGNC:1471  |
| <i>CARD9</i>    | 64170  | caspase recruitment domain family member 9                    | HGNC:16391 |
| <i>CATSPER1</i> | 117144 | cation channel sperm associated 1                             | HGNC:17116 |
| <i>CCDC106</i>  | 29903  | coiled-coil domain containing 106                             | HGNC:30181 |
| <i>CCDC15</i>   | 80071  | coiled-coil domain containing 15                              | HGNC:25798 |
| <i>CCDC85C</i>  | 317762 | coiled-coil domain containing 85C                             | HGNC:35459 |
| <i>CCL23</i>    | 6368   | C-C motif chemokine ligand 23                                 | HGNC:10622 |
| <i>CCT6B</i>    | 10693  | chaperonin containing TCP1 subunit 6B                         | HGNC:1621  |
| <i>CD320</i>    | 51293  | CD320 molecule                                                | HGNC:16692 |
| <i>CD82</i>     | 3732   | CD82 molecule                                                 | HGNC:6210  |
| <i>CDC20</i>    | 991    | cell division cycle 20                                        | HGNC:1723  |
| <i>CDC42BPA</i> | 8476   | CDC42 binding protein kinase alpha                            | HGNC:1737  |
| <i>CDCA2</i>    | 157313 | cell division cycle associated 2                              | HGNC:14623 |
| <i>CDCA5</i>    | 113130 | cell division cycle associated 5                              | HGNC:14626 |
| <i>CDCA8</i>    | 55143  | cell division cycle associated 8                              | HGNC:14629 |
| <i>CDH1</i>     | 999    | cadherin 1                                                    | HGNC:1748  |
| <i>CFD</i>      | 1675   | complement factor D                                           | HGNC:2771  |
| <i>CHAF1B</i>   | 8208   | chromatin assembly factor 1 subunit B                         | HGNC:1911  |

|                |        |                                                     |            |
|----------------|--------|-----------------------------------------------------|------------|
| <i>CHEK1</i>   | 1111   | checkpoint kinase 1                                 | HGNC:1925  |
| <i>CHI3L1</i>  | 1116   | chitinase 3 like 1                                  | HGNC:1932  |
| <i>CKAP2L</i>  | 150468 | cytoskeleton associated protein 2 like              | HGNC:26877 |
| <i>CKAP5</i>   | 9793   | cytoskeleton associated protein 5                   | HGNC:28959 |
| <i>CKB</i>     | 1152   | creatine kinase B                                   | HGNC:1991  |
| <i>CLCN4</i>   | 1183   | chloride voltage-gated channel 4                    | HGNC:2022  |
| <i>CLIP3</i>   | 25999  | CAP-Gly domain containing linker protein 3          | HGNC:24314 |
| <i>CNOT8</i>   | 9337   | CCR4-NOT transcription complex subunit 8            | HGNC:9207  |
| <i>COL18A1</i> | 80781  | collagen type XVIII alpha 1 chain                   | HGNC:2195  |
| <i>COL9A2</i>  | 1298   | collagen type IX alpha 2 chain                      | HGNC:2218  |
| <i>COMMD10</i> | 51397  | COMM domain containing 10                           | HGNC:30201 |
| <i>COMMD6</i>  | 170622 | COMM domain containing 6                            | HGNC:24015 |
| <i>COPG2</i>   | 26958  | COPI coat complex subunit gamma 2                   | HGNC:2237  |
| <i>COX4I1</i>  | 1327   | cytochrome c oxidase subunit 4I1                    | HGNC:2265  |
| <i>CRYBG3</i>  | 131544 | crystallin beta-gamma domain containing 3           | HGNC:34427 |
| <i>CSF1</i>    | 1435   | colony stimulating factor 1                         | HGNC:2432  |
| <i>CSNK1G3</i> | 1456   | casein kinase 1 gamma 3                             | HGNC:2456  |
| <i>CTSO</i>    | 1519   | cathepsin O                                         | HGNC:2542  |
| <i>CYB5R3</i>  | 1727   | cytochrome b5 reductase 3                           | HGNC:2873  |
| <i>CYSLTR2</i> | 57105  | cysteinyl leukotriene receptor 2                    | HGNC:18274 |
| <i>DAAM1</i>   | 23002  | dishevelled associated activator of morphogenesis 1 | HGNC:18142 |
| <i>DEPDC1</i>  | 55635  | DEP domain containing 1                             | HGNC:22949 |
| <i>DERA</i>    | 51071  | deoxyribose-phosphate aldolase                      | HGNC:24269 |
| <i>DGAT1</i>   | 8694   | diacylglycerol O-acyltransferase 1                  | HGNC:2843  |
| <i>DHCR7</i>   | 1717   | 7-dehydrocholesterol reductase                      | HGNC:2860  |
| <i>DHRS13</i>  | 147015 | dehydrogenase/reductase 13                          | HGNC:28326 |
| <i>DMXL2</i>   | 23312  | Dmx like 2                                          | HGNC:2938  |
| <i>DNAJC9</i>  | 23234  | DnaJ heat shock protein family (Hsp40) member C9    | HGNC:19123 |
| <i>DPEP2</i>   | 64174  | dipeptidase 2                                       | HGNC:23028 |

|                |        |                                                        |            |
|----------------|--------|--------------------------------------------------------|------------|
| <i>DSC2</i>    | 1824   | desmocollin 2                                          | HGNC:3036  |
| <i>DTWD2</i>   | 285605 | DTW domain containing 2                                | HGNC:19334 |
| <i>E2F8</i>    | 79733  | E2F transcription factor 8                             | HGNC:24727 |
| <i>EFCAB2</i>  | 84288  | EF-hand calcium binding domain 2                       | HGNC:28166 |
| <i>EFHC1</i>   | 114327 | EF-hand domain containing 1                            | HGNC:16406 |
| <i>ELOVL6</i>  | 79071  | ELOVL fatty acid elongase 6                            | HGNC:15829 |
| <i>EMILIN1</i> | 11117  | elastin microfibril interfacier 1                      | HGNC:19880 |
| <i>EMP1</i>    | 2012   | epithelial membrane protein 1                          | HGNC:3333  |
| <i>ENDOD1</i>  | 23052  | endonuclease domain containing 1                       | HGNC:29129 |
| <i>ERAP1</i>   | 51752  | endoplasmic reticulum aminopeptidase 1                 | HGNC:18173 |
| <i>ESPL1</i>   | 9700   | extra spindle pole bodies like 1, separase             | HGNC:16856 |
| <i>EVI2A</i>   | 2123   | ecotropic viral integration site 2A                    | HGNC:3499  |
| <i>FAM110B</i> | 90362  | family with sequence similarity 110 member B           | HGNC:28587 |
| <i>FAM13B</i>  | 51306  | family with sequence similarity 13 member B            | HGNC:1335  |
| <i>FAM83D</i>  | 81610  | family with sequence similarity 83 member D            | HGNC:16122 |
| <i>FAM89A</i>  | 375061 | family with sequence similarity 89 member A            | HGNC:25057 |
| <i>FARP1</i>   | 10160  | FERM, ARH/RhoGEF and pleckstrin domain protein 1       | HGNC:3591  |
| <i>FBXL17</i>  | 64839  | F-box and leucine rich repeat protein 17               | HGNC:13615 |
| <i>FBXO38</i>  | 81545  | F-box protein 38                                       | HGNC:28844 |
| <i>FGD5</i>    | 152273 | FYVE, RhoGEF and PH domain containing 5                | HGNC:19117 |
| <i>FHL2</i>    | 2274   | four and a half LIM domains 2                          | HGNC:3703  |
| <i>FHL3</i>    | 2275   | four and a half LIM domains 3                          | HGNC:3704  |
| <i>FKBP4</i>   | 2288   | FKBP prolyl isomerase 4                                | HGNC:3720  |
| <i>FN3K</i>    | 64122  | fructosamine 3 kinase                                  | HGNC:24822 |
| <i>FOXM1</i>   | 2305   | forkhead box M1                                        | HGNC:3818  |
| <i>FOXRED2</i> | 80020  | FAD dependent oxidoreductase domain containing 2       | HGNC:26264 |
| <i>FSD1L</i>   | 83856  | fibronectin type III and SPRY domain containing 1 like | HGNC:13753 |
| <i>FTO</i>     | 79068  | FTO alpha-ketoglutarate dependent dioxygenase          | HGNC:24678 |
| <i>FUT8</i>    | 2530   | fucosyltransferase 8                                   | HGNC:4019  |

|                  |        |                                                        |            |
|------------------|--------|--------------------------------------------------------|------------|
| <i>GALE</i>      | 2582   | UDP-galactose-4-epimerase                              | HGNC:4116  |
| <i>GALNT11</i>   | 63917  | polypeptide N-acetylgalactosaminyltransferase 11       | HGNC:19875 |
| <i>GAPT</i>      | 202309 | GRB2 binding adaptor protein, transmembrane            | HGNC:26588 |
| <i>GAS2L1</i>    | 10634  | growth arrest specific 2 like 1                        | HGNC:16955 |
| <i>GATA1</i>     | 2623   | GATA binding protein 1                                 | HGNC:4170  |
| <i>GATAD1</i>    | 57798  | GATA zinc finger domain containing 1                   | HGNC:29941 |
| <i>GCLM</i>      | 2730   | glutamate-cysteine ligase modifier subunit             | HGNC:4312  |
| <i>GFI1B</i>     | 8328   | growth factor independent 1B transcriptional repressor | HGNC:4238  |
| <i>GIPC1</i>     | 10755  | GIPC PDZ domain containing family member 1             | HGNC:1226  |
| <i>GM2A</i>      | 2760   | ganglioside GM2 activator                              | HGNC:4367  |
| <i>GRAP2</i>     | 9402   | GRB2 related adaptor protein 2                         | HGNC:4563  |
| <i>GSTK1</i>     | 373156 | glutathione S-transferase kappa 1                      | HGNC:16906 |
| <i>GTF2IRD2</i>  | 84163  | GTF2I repeat domain containing 2                       | HGNC:30775 |
| <i>GTF2IRD2B</i> | 389524 | GTF2I repeat domain containing 2B                      | HGNC:33125 |
| <i>GTSE1</i>     | 51512  | G2 and S-phase expressed 1                             | HGNC:13698 |
| <i>HARS2</i>     | 23438  | histidyl-tRNA synthetase 2, mitochondrial              | HGNC:4817  |
| <i>HAUS8</i>     | 93323  | HAUS augmin like complex subunit 8                     | HGNC:30532 |
| <i>HAVCR2</i>    | 84868  | hepatitis A virus cellular receptor 2                  | HGNC:18437 |
| <i>HBG1</i>      | 3047   | hemoglobin subunit gamma 1                             | HGNC:4831  |
| <i>HBG2</i>      | 3048   | hemoglobin subunit gamma 2                             | HGNC:4832  |
| <i>HHAT</i>      | 55733  | hedgehog acyltransferase                               | HGNC:18270 |
| <i>HIGD2A</i>    | 192286 | HIG1 hypoxia inducible domain family member 2A         | HGNC:28311 |
| <i>HINT1</i>     | 3094   | histidine triad nucleotide binding protein 1           | HGNC:4912  |
| <i>HJURP</i>     | 55355  | Holliday junction recognition protein                  | HGNC:25444 |
| <i>HMBS</i>      | 3145   | hydroxymethylbilane synthase                           | HGNC:4982  |
| <i>HMGN5</i>     | 79366  | high mobility group nucleosome binding domain 5        | HGNC:8013  |
| <i>HNMT</i>      | 3176   | histamine N-methyltransferase                          | HGNC:5028  |
| <i>HOXA11</i>    | 3207   | homeobox A11                                           | HGNC:5101  |
| <i>HOXA3</i>     | 3200   | homeobox A3                                            | HGNC:5104  |

|                |        |                                                                    |            |
|----------------|--------|--------------------------------------------------------------------|------------|
| <i>HOXA4</i>   | 3201   | homeobox A4                                                        | HGNC:5105  |
| <i>HOXA6</i>   | 3203   | homeobox A6                                                        | HGNC:5107  |
| <i>HOXB3</i>   | 3213   | homeobox B3                                                        | HGNC:5114  |
| <i>HOXB4</i>   | 3214   | homeobox B4                                                        | HGNC:5115  |
| <i>HOXB6</i>   | 3216   | homeobox B6                                                        | HGNC:5117  |
| <i>HOXB7</i>   | 3217   | homeobox B7                                                        | HGNC:5118  |
| <i>HOXB8</i>   | 3218   | homeobox B8                                                        | HGNC:5119  |
| <i>HOXB9</i>   | 3219   | homeobox B9                                                        | HGNC:5120  |
| <i>HSD17B4</i> | 3295   | hydroxysteroid 17-beta dehydrogenase 4                             | HGNC:5213  |
| <i>HSPB1</i>   | 3315   | heat shock protein family B (small) member 1                       | HGNC:5246  |
| <i>HSPG2</i>   | 3339   | heparan sulfate proteoglycan 2                                     | HGNC:5273  |
| <i>ICAM4</i>   | 3386   | intercellular adhesion molecule 4 (Landsteiner-Wiener blood group) | HGNC:5347  |
| <i>IFITM1</i>  | 8519   | interferon induced transmembrane protein 1                         | HGNC:5412  |
| <i>IFITM2</i>  | 10581  | interferon induced transmembrane protein 2                         | HGNC:5413  |
| <i>IGSF10</i>  | 285313 | immunoglobulin superfamily member 10                               | HGNC:26384 |
| <i>IL12A</i>   | 3592   | interleukin 12A                                                    | HGNC:5969  |
| <i>IL7</i>     | 3574   | interleukin 7                                                      | HGNC:6023  |
| <i>ILDR2</i>   | 387597 | immunoglobulin like domain containing receptor 2                   | HGNC:18131 |
| <i>IMMP2L</i>  | 83943  | inner mitochondrial membrane peptidase subunit 2                   | HGNC:14598 |
| <i>ING3</i>    | 54556  | inhibitor of growth family member 3                                | HGNC:14587 |
| <i>IQSEC2</i>  | 23096  | IQ motif and Sec7 domain ArfGEF 2                                  | HGNC:29059 |
| <i>IRX3</i>    | 79191  | iroquois homeobox 3                                                | HGNC:14360 |
| <i>IRX5</i>    | 10265  | iroquois homeobox 5                                                | HGNC:14361 |
| <i>ITGAE</i>   | 3682   | integrin subunit alpha E                                           | HGNC:6147  |
| <i>ITPR3</i>   | 3710   | inositol 1,4,5-trisphosphate receptor type 3                       | HGNC:6182  |
| <i>ITPRIP1</i> | 150771 | ITPRIP like 1                                                      | HGNC:29371 |
| <i>JAM3</i>    | 83700  | junctional adhesion molecule 3                                     | HGNC:15532 |
| <i>KANK2</i>   | 25959  | KN motif and ankyrin repeat domains 2                              | HGNC:29300 |
| <i>KCTD1</i>   | 284252 | potassium channel tetramerization domain containing 1              | HGNC:18249 |

|                 |        |                                                                  |            |
|-----------------|--------|------------------------------------------------------------------|------------|
| <i>KCTD9</i>    | 54793  | potassium channel tetramerization domain containing 9            | HGNC:22401 |
| <i>KIAA1549</i> | 57670  | KIAA1549                                                         | HGNC:22219 |
| <i>KIF26B</i>   | 55083  | kinesin family member 26B                                        | HGNC:25484 |
| <i>KIF27</i>    | 55582  | kinesin family member 27                                         | HGNC:18632 |
| <i>KIF2C</i>    | 11004  | kinesin family member 2C                                         | HGNC:6393  |
| <i>KIF3C</i>    | 3797   | kinesin family member 3C                                         | HGNC:6321  |
| <i>KIF4A</i>    | 24137  | kinesin family member 4A                                         | HGNC:13339 |
| <i>KLHDC8B</i>  | 200942 | kelch domain containing 8B                                       | HGNC:28557 |
| <i>KLRG1</i>    | 10219  | killer cell lectin like receptor G1                              | HGNC:6380  |
| <i>LIPE</i>     | 3991   | lipase E, hormone sensitive type                                 | HGNC:6621  |
| <i>LNPEP</i>    | 4012   | leucyl and cystinyl aminopeptidase                               | HGNC:6656  |
| <i>LRBA</i>     | 987    | LPS responsive beige-like anchor protein                         | HGNC:1742  |
| <i>LRFN4</i>    | 78999  | leucine rich repeat and fibronectin type III domain containing 4 | HGNC:28456 |
| <i>LRRC23</i>   | 10233  | leucine rich repeat containing 23                                | HGNC:19138 |
| <i>LRRC27</i>   | 80313  | leucine rich repeat containing 27                                | HGNC:29346 |
| <i>LRRN2</i>    | 10446  | leucine rich repeat neuronal 2                                   | HGNC:16914 |
| <i>LSR</i>      | 51599  | lipolysis stimulated lipoprotein receptor                        | HGNC:29572 |
| <i>LTK</i>      | 4058   | leukocyte receptor tyrosine kinase                               | HGNC:6721  |
| <i>LY6E</i>     | 4061   | lymphocyte antigen 6 family member E                             | HGNC:6727  |
| <i>MAP3K1</i>   | 4214   | mitogen-activated protein kinase kinase kinase 1                 | HGNC:6848  |
| <i>MED7</i>     | 9443   | mediator complex subunit 7                                       | HGNC:2378  |
| <i>MFHAS1</i>   | 9258   | multifunctional ROCO family signaling regulator 1                | HGNC:16982 |
| <i>MFSD1</i>    | 64747  | major facilitator superfamily domain containing 1                | HGNC:25874 |
| <i>MFSD2B</i>   | 388931 | MFSD2 lysolipid transporter B, sphingolipid                      | HGNC:37207 |
| <i>MLYCD</i>    | 23417  | malonyl-CoA decarboxylase                                        | HGNC:7150  |
| <i>MMD</i>      | 23531  | monocyte to macrophage differentiation associated                | HGNC:7153  |
| <i>MRPS33</i>   | 51650  | mitochondrial ribosomal protein S33                              | HGNC:16634 |
| <i>MYCT1</i>    | 80177  | MYC target 1                                                     | HGNC:23172 |
| <i>MYH10</i>    | 4628   | myosin heavy chain 10                                            | HGNC:7568  |

|                 |        |                                                                   |            |
|-----------------|--------|-------------------------------------------------------------------|------------|
| <i>MYL4</i>     | 4635   | myosin light chain 4                                              | HGNC:7585  |
| <i>NAGPA</i>    | 51172  | N-acetylglucosamine-1-phosphodiester alpha-N-acetylglucosamine    | HGNC:17378 |
| <i>NAV1</i>     | 89796  | neuron navigator 1                                                | HGNC:15989 |
| <i>NBR2</i>     | 10230  | neighbor of BRCA1 lncRNA 2                                        | HGNC:20691 |
| <i>NCAPD3</i>   | 23310  | non-SMC condensin II complex subunit D3                           | HGNC:28952 |
| <i>NCAPH</i>    | 23397  | non-SMC condensin I complex subunit H                             | HGNC:1112  |
| <i>NCKAP1</i>   | 10787  | NCK associated protein 1                                          | HGNC:7666  |
| <i>NDUFB5</i>   | 4711   | NADH:ubiquinone oxidoreductase subunit B5                         | HGNC:7700  |
| <i>NEDD4L</i>   | 23327  | NEDD4 like E3 ubiquitin protein ligase                            | HGNC:7728  |
| <i>NEK10</i>    | 152110 | NIMA related kinase 10                                            | HGNC:18592 |
| <i>NEK2</i>     | 4751   | NIMA related kinase 2                                             | HGNC:7745  |
| <i>NPW</i>      | 283869 | neuropeptide W                                                    | HGNC:30509 |
| <i>NQO1</i>     | 1728   | NAD(P)H quinone dehydrogenase 1                                   | HGNC:2874  |
| <i>NSA2</i>     | 10412  | NSA2 ribosome biogenesis factor                                   | HGNC:30728 |
| <i>NUDT7</i>    | 283927 | nudix hydrolase 7                                                 | HGNC:8054  |
| <i>NUF2</i>     | 83540  | NUF2 component of NDC80 kinetochore complex                       | HGNC:14621 |
| <i>OAF</i>      | 220323 | out at first homolog                                              | HGNC:28752 |
| <i>OPTN</i>     | 10133  | optineurin                                                        | HGNC:17142 |
| <i>ORAI2</i>    | 80228  | ORAI calcium release-activated calcium modulator 2                | HGNC:21667 |
| <i>ORC1</i>     | 4998   | origin recognition complex subunit 1                              | HGNC:8487  |
| <i>OTUD7B</i>   | 56957  | OTU deubiquitinase 7B                                             | HGNC:16683 |
| <i>PAFAH1B3</i> | 5050   | platelet activating factor acetylhydrolase 1b catalytic subunit 3 | HGNC:8576  |
| <i>PARVB</i>    | 29780  | parvin beta                                                       | HGNC:14653 |
| <i>PBX3</i>     | 5090   | PBX homeobox 3                                                    | HGNC:8634  |
| <i>PC</i>       | 5091   | pyruvate carboxylase                                              | HGNC:8636  |
| <i>PCBD2</i>    | 84105  | pterin-4 alpha-carbinolamine dehydratase 2                        | HGNC:24474 |
| <i>PCYT1B</i>   | 9468   | phosphate cytidylyltransferase 1B, choline                        | HGNC:8755  |
| <i>PGGT1B</i>   | 5229   | protein geranylgeranyltransferase type I subunit beta             | HGNC:8895  |
| <i>PII5</i>     | 51050  | peptidase inhibitor 15                                            | HGNC:8946  |



|                |        |                                                                    |            |
|----------------|--------|--------------------------------------------------------------------|------------|
| <i>PIK3CG</i>  | 5294   | phosphatidylinositol-4,5-bisphosphate 3-kinase catalytic subunit g | HGNC:8978  |
| <i>PKLR</i>    | 5313   | pyruvate kinase L/R                                                | HGNC:9020  |
| <i>PKN3</i>    | 29941  | protein kinase N3                                                  | HGNC:17999 |
| <i>PLCB4</i>   | 5332   | phospholipase C beta 4                                             | HGNC:9059  |
| <i>PLEKHG4</i> | 25894  | pleckstrin homology and RhoGEF domain containing G4                | HGNC:24501 |
| <i>PMPCB</i>   | 9512   | peptidase, mitochondrial processing subunit beta                   | HGNC:9119  |
| <i>PNMA1</i>   | 9240   | PNMA family member 1                                               | HGNC:9158  |
| <i>POLN</i>    | 353497 | DNA polymerase nu                                                  | HGNC:18870 |
| <i>POU2AF1</i> | 5450   | POU class 2 homeobox associating factor 1                          | HGNC:9211  |
| <i>PPAN</i>    | 56342  | peter pan homolog                                                  | HGNC:9227  |
| <i>PRDX4</i>   | 10549  | peroxiredoxin 4                                                    | HGNC:17169 |
| <i>PROS1</i>   | 5627   | protein S                                                          | HGNC:9456  |
| <i>PRR5</i>    | 55615  | proline rich 5                                                     | HGNC:31682 |
| <i>PRRT3</i>   | 285368 | proline rich transmembrane protein 3                               | HGNC:26591 |
| <i>PRX</i>     | 57716  | periaxin                                                           | HGNC:13797 |
| <i>PSMB10</i>  | 5699   | proteasome 20S subunit beta 10                                     | HGNC:9538  |
| <i>PSMG1</i>   | 8624   | proteasome assembly chaperone 1                                    | HGNC:3043  |
| <i>PTGDS</i>   | 5730   | prostaglandin D2 synthase                                          | HGNC:9592  |
| <i>PYCARD</i>  | 29108  | PYD and CARD domain containing                                     | HGNC:16608 |
| <i>PYCR1</i>   | 5831   | pyrroline-5-carboxylate reductase 1                                | HGNC:9721  |
| <i>RAB30</i>   | 27314  | RAB30, member RAS oncogene family                                  | HGNC:9770  |
| <i>RAB33A</i>  | 9363   | RAB33A, member RAS oncogene family                                 | HGNC:9773  |
| <i>RAB3IL1</i> | 5866   | RAB3A interacting protein like 1                                   | HGNC:9780  |
| <i>RAC3</i>    | 5881   | Rac family small GTPase 3                                          | HGNC:9803  |
| <i>RAD54L</i>  | 8438   | RAD54 like                                                         | HGNC:9826  |
| <i>REC8</i>    | 9985   | REC8 meiotic recombination protein                                 | HGNC:16879 |
| <i>RECQL4</i>  | 9401   | RecQ like helicase 4                                               | HGNC:9949  |
| <i>REXO2</i>   | 25996  | RNA exonuclease 2                                                  | HGNC:17851 |
| <i>RIMS3</i>   | 9783   | regulating synaptic membrane exocytosis 3                          | HGNC:21292 |

|                |        |                                                             |            |
|----------------|--------|-------------------------------------------------------------|------------|
| <i>RNF135</i>  | 84282  | ring finger protein 135                                     | HGNC:21158 |
| <i>RPGR</i>    | 6103   | retinitis pigmentosa GTPase regulator                       | HGNC:10295 |
| <i>RPL12</i>   | 6136   | ribosomal protein L12                                       | HGNC:10302 |
| <i>RPL15</i>   | 6138   | ribosomal protein L15                                       | HGNC:10306 |
| <i>RPL17</i>   | 6139   | ribosomal protein L17                                       | HGNC:10307 |
| <i>RPL22L1</i> | 200916 | ribosomal protein L22 like 1                                | HGNC:27610 |
| <i>RPL23</i>   | 9349   | ribosomal protein L23                                       | HGNC:10316 |
| <i>RPL26</i>   | 6154   | ribosomal protein L26                                       | HGNC:10327 |
| <i>RPL27</i>   | 6155   | ribosomal protein L27                                       | HGNC:10328 |
| <i>RPL34</i>   | 6164   | ribosomal protein L34                                       | HGNC:10340 |
| <i>RPL35A</i>  | 6165   | ribosomal protein L35a                                      | HGNC:10345 |
| <i>RPL38</i>   | 6169   | ribosomal protein L38                                       | HGNC:10349 |
| <i>RPL39</i>   | 6170   | ribosomal protein L39                                       | HGNC:10350 |
| <i>RPS10</i>   | 6204   | ribosomal protein S10                                       | HGNC:10383 |
| <i>RPS14</i>   | 6208   | ribosomal protein S14                                       | HGNC:10387 |
| <i>RPS23</i>   | 6228   | ribosomal protein S23                                       | HGNC:10410 |
| <i>RPS27</i>   | 6232   | ribosomal protein S27                                       | HGNC:10416 |
| <i>RPS27L</i>  | 51065  | ribosomal protein S27 like                                  | HGNC:18476 |
| <i>RPS4X</i>   | 6191   | ribosomal protein S4 X-linked                               | HGNC:10424 |
| <i>RRN3P2</i>  | 653390 | RRN3 pseudogene 2                                           | HGNC:37619 |
| <i>RRP1B</i>   | 23076  | ribosomal RNA processing 1B                                 | HGNC:23818 |
| <i>RYR3</i>    | 6263   | ryanodine receptor 3                                        | HGNC:10485 |
| <i>S100B</i>   | 6285   | S100 calcium binding protein B                              | HGNC:10500 |
| <i>SAGE1</i>   | 55511  | sarcoma antigen 1                                           | HGNC:30369 |
| <i>SCD</i>     | 6319   | stearoyl-CoA desaturase                                     | HGNC:10571 |
| <i>SCUBE1</i>  | 80274  | signal peptide, CUB domain and EGF like domain containing 1 | HGNC:13441 |
| <i>SEC11A</i>  | 23478  | SEC11 homolog A, signal peptidase complex subunit           | HGNC:17718 |
| <i>SEC14L2</i> | 23541  | SEC14 like lipid binding 2                                  | HGNC:10699 |
| <i>SEMA3C</i>  | 10512  | semaphorin 3C                                               | HGNC:10725 |

|                 |        |                                                            |            |
|-----------------|--------|------------------------------------------------------------|------------|
| <i>SEMA4B</i>   | 10509  | semaphorin 4B                                              | HGNC:10730 |
| <i>SERPINE2</i> | 5270   | serpin family E member 2                                   | HGNC:8951  |
| <i>SERPINI1</i> | 5274   | serpin family I member 1                                   | HGNC:8943  |
| <i>SGMS1</i>    | 259230 | sphingomyelin synthase 1                                   | HGNC:29799 |
| <i>SGPP1</i>    | 81537  | sphingosine-1-phosphate phosphatase 1                      | HGNC:17720 |
| <i>SH2D3A</i>   | 10045  | SH2 domain containing 3A                                   | HGNC:16885 |
| <i>SH3BGR2</i>  | 83699  | SH3 domain binding glutamate rich protein like 2           | HGNC:15567 |
| <i>SH3BP5</i>   | 9467   | SH3 domain binding protein 5                               | HGNC:10827 |
| <i>SIGMAR1</i>  | 10280  | sigma non-opioid intracellular receptor 1                  | HGNC:8157  |
| <i>SIL1</i>     | 64374  | SIL1 nucleotide exchange factor                            | HGNC:24624 |
| <i>SKA1</i>     | 220134 | spindle and kinetochore associated complex subunit 1       | HGNC:28109 |
| <i>SLC18A2</i>  | 6571   | solute carrier family 18 member A2                         | HGNC:10935 |
| <i>SLC1A5</i>   | 6510   | solute carrier family 1 member 5                           | HGNC:10943 |
| <i>SLC22A23</i> | 63027  | solute carrier family 22 member 23                         | HGNC:21106 |
| <i>SLC25A23</i> | 79085  | solute carrier family 25 member 23                         | HGNC:19375 |
| <i>SLC25A35</i> | 399512 | solute carrier family 25 member 35                         | HGNC:31921 |
| <i>SLC26A2</i>  | 1836   | solute carrier family 26 member 2                          | HGNC:10994 |
| <i>SLC29A2</i>  | 3177   | solute carrier family 29 member 2                          | HGNC:11004 |
| <i>SLC2A1</i>   | 6513   | solute carrier family 2 member 1                           | HGNC:11005 |
| <i>SLC2A13</i>  | 114134 | solute carrier family 2 member 13                          | HGNC:15956 |
| <i>SLC2A9</i>   | 56606  | solute carrier family 2 member 9                           | HGNC:13446 |
| <i>SLC38A5</i>  | 92745  | solute carrier family 38 member 5                          | HGNC:18070 |
| <i>SLC41A1</i>  | 254428 | solute carrier family 41 member 1                          | HGNC:19429 |
| <i>SLC43A1</i>  | 8501   | solute carrier family 43 member 1                          | HGNC:9225  |
| <i>SLC43A3</i>  | 29015  | solute carrier family 43 member 3                          | HGNC:17466 |
| <i>SLC44A2</i>  | 57153  | solute carrier family 44 member 2                          | HGNC:17292 |
| <i>SLC7A1</i>   | 6541   | solute carrier family 7 member 1                           | HGNC:11057 |
| <i>SLCO4A1</i>  | 28231  | solute carrier organic anion transporter family member 4A1 | HGNC:10953 |
| <i>SMAD5</i>    | 4090   | SMAD family member 5                                       | HGNC:6771  |

|                |        |                                                                   |            |
|----------------|--------|-------------------------------------------------------------------|------------|
| <i>SMAGP</i>   | 57228  | small cell adhesion glycoprotein                                  | HGNC:26918 |
| <i>SNHG5</i>   | 387066 | small nucleolar RNA host gene 5                                   | HGNC:21026 |
| <i>SNPH</i>    | 9751   | syntaphilin                                                       | HGNC:15931 |
| <i>SNX2</i>    | 6643   | sorting nexin 2                                                   | HGNC:11173 |
| <i>SOD1</i>    | 6647   | superoxide dismutase 1                                            | HGNC:11179 |
| <i>SORBS1</i>  | 10580  | sorbin and SH3 domain containing 1                                | HGNC:14565 |
| <i>SPINT2</i>  | 10653  | serine peptidase inhibitor, Kunitz type 2                         | HGNC:11247 |
| <i>SPMIP4</i>  | 136895 | sperm microtubule inner protein 4                                 | HGNC:21722 |
| <i>SPTBN2</i>  | 6712   | spectrin beta, non-erythrocytic 2                                 | HGNC:11276 |
| <i>SQLE</i>    | 6713   | squalene epoxidase                                                | HGNC:11279 |
| <i>SRC</i>     | 6714   | SRC proto-oncogene, non-receptor tyrosine kinase                  | HGNC:11283 |
| <i>SREBF2</i>  | 6721   | sterol regulatory element binding transcription factor 2          | HGNC:11290 |
| <i>SSBP1</i>   | 6742   | single stranded DNA binding protein 1                             | HGNC:11317 |
| <i>SSBP3</i>   | 23648  | single stranded DNA binding protein 3                             | HGNC:15674 |
| <i>ST8SIA4</i> | 7903   | ST8 alpha-N-acetyl-neuraminide alpha-2,8-sialyltransferase 4      | HGNC:10871 |
| <i>STAC3</i>   | 246329 | SH3 and cysteine rich domain 3                                    | HGNC:28423 |
| <i>STARD10</i> | 10809  | StAR related lipid transfer domain containing 10                  | HGNC:10666 |
| <i>STIL</i>    | 6491   | STIL centriolar assembly protein                                  | HGNC:10879 |
| <i>STS</i>     | 412    | steroid sulfatase                                                 | HGNC:11425 |
| <i>SV2B</i>    | 9899   | synaptic vesicle glycoprotein 2B                                  | HGNC:16874 |
| <i>SYNGAP1</i> | 8831   | synaptic Ras GTPase activating protein 1                          | HGNC:11497 |
| <i>SYNJ2</i>   | 8871   | synaptojanin 2                                                    | HGNC:11504 |
| <i>TAL1</i>    | 6886   | TAL bHLH transcription factor 1, erythroid differentiation factor | HGNC:11556 |
| <i>TAX1BP1</i> | 8887   | Tax1 binding protein 1                                            | HGNC:11575 |
| <i>TBC1D4</i>  | 9882   | TBC1 domain family member 4                                       | HGNC:19165 |
| <i>TBPL1</i>   | 9519   | TATA-box binding protein like 1                                   | HGNC:11589 |
| <i>TBXAS1</i>  | 6916   | thromboxane A synthase 1                                          | HGNC:11609 |
| <i>TC2N</i>    | 123036 | tandem C2 domains, nuclear                                        | HGNC:19859 |
| <i>TCTNI</i>   | 79600  | tectonic family member 1                                          | HGNC:26113 |

|                 |        |                                                        |            |
|-----------------|--------|--------------------------------------------------------|------------|
| <i>TDRKH</i>    | 11022  | tudor and KH domain containing                         | HGNC:11713 |
| <i>TFDP1</i>    | 7027   | transcription factor Dp-1                              | HGNC:11749 |
| <i>TFEC</i>     | 22797  | transcription factor EC                                | HGNC:11754 |
| <i>TGFB1I1</i>  | 7041   | transforming growth factor beta 1 induced transcript 1 | HGNC:11767 |
| <i>TGM2</i>     | 7052   | transglutaminase 2                                     | HGNC:11778 |
| <i>TGS1</i>     | 96764  | trimethylguanosine synthase 1                          | HGNC:17843 |
| <i>THG1L</i>    | 54974  | tRNA-histidine guanylyltransferase 1 like              | HGNC:26053 |
| <i>THSD7A</i>   | 221981 | thrombospondin type 1 domain containing 7A             | HGNC:22207 |
| <i>TIAM1</i>    | 7074   | TIAM Rac1 associated GEF 1                             | HGNC:11805 |
| <i>TIGD6</i>    | 81789  | tigger transposable element derived 6                  | HGNC:18332 |
| <i>TIMP3</i>    | 7078   | TIMP metalloproteinase inhibitor 3                     | HGNC:11822 |
| <i>TK2</i>      | 7084   | thymidine kinase 2                                     | HGNC:11831 |
| <i>TMCO4</i>    | 255104 | transmembrane and coiled-coil domains 4                | HGNC:27393 |
| <i>TMED7</i>    | 51014  | transmembrane p24 trafficking protein 7                | HGNC:24253 |
| <i>TMEM105</i>  | 284186 | TMEM105 long non-coding RNA                            | HGNC:26794 |
| <i>TMEM106A</i> | 113277 | transmembrane protein 106A                             | HGNC:28288 |
| <i>TMEM63B</i>  | 55362  | transmembrane protein 63B                              | HGNC:17735 |
| <i>TMT1A</i>    | 25840  | thiol methyltransferase 1A                             | HGNC:24550 |
| <i>TNFAIP8</i>  | 25816  | TNF alpha induced protein 8                            | HGNC:17260 |
| <i>TNFRSF25</i> | 8718   | TNF receptor superfamily member 25                     | HGNC:11910 |
| <i>TNFSF12</i>  | 8742   | TNF superfamily member 12                              | HGNC:11927 |
| <i>TNFSF13</i>  | 8741   | TNF superfamily member 13                              | HGNC:11928 |
| <i>TNXB</i>     | 7148   | tenascin XB                                            | HGNC:11976 |
| <i>TOMM7</i>    | 54543  | translocase of outer mitochondrial membrane 7          | HGNC:21648 |
| <i>TPK1</i>     | 27010  | thiamin pyrophosphokinase 1                            | HGNC:17358 |
| <i>TPM1</i>     | 7168   | tropomyosin 1                                          | HGNC:12010 |
| <i>TPST2</i>    | 8459   | tyrosylprotein sulfotransferase 2                      | HGNC:12021 |
| <i>TPX2</i>     | 22974  | TPX2 microtubule nucleation factor                     | HGNC:1249  |
| <i>TRIB2</i>    | 28951  | tribbles pseudokinase 2                                | HGNC:30809 |

|                |        |                                                               |            |
|----------------|--------|---------------------------------------------------------------|------------|
| <i>TRIP10</i>  | 9322   | thyroid hormone receptor interactor 10                        | HGNC:12304 |
| <i>TROAP</i>   | 10024  | trophinin associated protein                                  | HGNC:12327 |
| <i>TSPAN31</i> | 6302   | tetraspanin 31                                                | HGNC:10539 |
| <i>TSPAN5</i>  | 10098  | tetraspanin 5                                                 | HGNC:17753 |
| <i>TTC39B</i>  | 158219 | tetratricopeptide repeat domain 39B                           | HGNC:23704 |
| <i>TUBG1</i>   | 7283   | tubulin gamma 1                                               | HGNC:12417 |
| <i>UBASH3A</i> | 53347  | ubiquitin associated and SH3 domain containing A              | HGNC:12462 |
| <i>UBXN10</i>  | 127733 | UBX domain protein 10                                         | HGNC:26354 |
| <i>UROD</i>    | 7389   | uroporphyrinogen decarboxylase                                | HGNC:12591 |
| <i>UROS</i>    | 7390   | uroporphyrinogen III synthase                                 | HGNC:12592 |
| <i>USP44</i>   | 84101  | ubiquitin specific peptidase 44                               | HGNC:20064 |
| <i>VIM</i>     | 7431   | vimentin                                                      | HGNC:12692 |
| <i>WDR5B</i>   | 54554  | WD repeat domain 5B                                           | HGNC:17826 |
| <i>WDR62</i>   | 284403 | WD repeat domain 62                                           | HGNC:24502 |
| <i>WEE1</i>    | 7465   | WEE1 G2 checkpoint kinase                                     | HGNC:12761 |
| <i>XRCC4</i>   | 7518   | X-ray repair cross complementing 4                            | HGNC:12831 |
| <i>YWHAH</i>   | 7533   | tyrosine 3-monooxygenase/tryptophan 5-monooxygenase activatio | HGNC:12853 |
| <i>ZCWPW1</i>  | 55063  | zinc finger CW-type and PWWP domain containing 1              | HGNC:23486 |
| <i>ZDHHC21</i> | 340481 | zinc finger DHHC-type palmitoyltransferase 21                 | HGNC:20750 |
| <i>ZIK1</i>    | 284307 | zinc finger protein interacting with K protein 1              | HGNC:33104 |
| <i>ZNF208</i>  | 7757   | zinc finger protein 208                                       | HGNC:12999 |
| <i>ZNF229</i>  | 7772   | zinc finger protein 229                                       | HGNC:13022 |
| <i>ZNF277</i>  | 11179  | zinc finger protein 277                                       | HGNC:13070 |
| <i>ZNF347</i>  | 84671  | zinc finger protein 347                                       | HGNC:16447 |
| <i>ZNF354C</i> | 30832  | zinc finger protein 354C                                      | HGNC:16736 |
| <i>ZNF514</i>  | 84874  | zinc finger protein 514                                       | HGNC:25894 |
| <i>ZNF528</i>  | 84436  | zinc finger protein 528                                       | HGNC:29384 |
| <i>ZNF585B</i> | 92285  | zinc finger protein 585B                                      | HGNC:30948 |
| <i>ZNF804A</i> | 91752  | zinc finger protein 804A                                      | HGNC:21711 |

|               |        |                                    |            |
|---------------|--------|------------------------------------|------------|
| <i>ZNF90</i>  | 7643   | zinc finger protein 90             | HGNC:13165 |
| <i>ZSWIM7</i> | 125150 | zinc finger SWIM-type containing 7 | HGNC:26993 |

---

*HGNC* The HUGO Gene Nomenclature Committee.
