# Supplementary material for: Identification of a Complex Karyotype Signature with Clinical Implications in AML and MDS-EB Using Gene Expression Profiling
Source: MDPI journal article supplement (doi:10.3390/cancers15215289), 2023-11-04
Supplement: s1 [file s1]

**Table S5.** Patient characteristic of the TCGA cohort evaluated for clinical significance of complex karyotype.

|                                   | <b>Total (n=133)</b> | <b>CK (n=23)</b> | <b>Non-CK (n=110)</b> | <b>P</b>     |
|-----------------------------------|----------------------|------------------|-----------------------|--------------|
| Sex (%)                           |                      |                  |                       | 0.307        |
| Male                              | 65 (48.9)            | 9 (69.2)         | 56 (50.9)             |              |
| Female                            | 58 (51.1)            | 4 (30.8)         | 54 (49.1)             |              |
| Age (years)                       |                      |                  |                       | 0.152        |
| Median (range)                    | 60.0 (18.0-88.0)     | 65.0 (18.0-81.0) | 59.0 (21.0-88.0)      |              |
| WBC count ( × 10 <sup>9</sup> /L) |                      |                  |                       | <b>0.009</b> |
| Median (range)                    | 16.0 (0.6-297.4)     | 9.9 (0.7-47.6)   | 24.5 (0.6-297.4)      |              |
| BM blasts (%)                     |                      |                  |                       | <b>0.009</b> |
| Median (range)                    | 72.0 (30.0-100.0)    | 58.0 (30.0-97.0) | 75.0 (30.0-100.0)     |              |
| Risk stratification by 2022 ELN   |                      |                  |                       | <b>0.000</b> |
| Favorable                         | 37 (27.8)            | 0 (0.0)          | 37 (33.6)             |              |
| Intermediate                      | 39 (29.3)            | 0 (0.0)          | 39 (35.5)             |              |
| Adverse                           | 48 (36.1)            | 23 (100.0)       | 25 (22.7)             |              |
| Not assessed                      | 9 (6.7)              | 0 (0.0)          | 9 (8.2)               |              |
| Risk stratification by genetics   |                      |                  |                       |              |
| <i>FLT3-ITD</i>                   |                      |                  |                       | 0.098        |
| <i>without</i>                    | 108 (81.2)           | 22 (95.7)        | 86 (78.2)             |              |
| <i>with</i>                       | 25 (18.8)            | 1 ( 4.3)         | 24 (21.8)             |              |
| <i>NA</i>                         | 0 (0.0)              | 0 (0.0)          | 0 (0.0)               |              |
| mutated <i>RUNX1</i>              |                      |                  |                       | 0.171        |
| <i>without</i>                    | 118 (88.7)           | 23 (100.0)       | 95 (86.4)             |              |
| <i>with</i>                       | 15 (11.3)            | 0 ( 0.0)         | 15 (13.6)             |              |
| <i>NA</i>                         | 0 ( 0.0)             | 0 ( 0.0)         | 0 ( 0.0)              |              |
| Overall survival (months)         |                      |                  |                       | <b>0.021</b> |
| Median (range)                    | 13.8 (0.0-118.1)     | 7.2 (0.0-95.5)   | 16.4 (0.1-118.1)      |              |

TCGA The Cancer Genome Atlas, WBC White blood cell, BM Bone marrow, ITD Internal tandem duplication, NA Not applicable.
