# Supplementary material for: Identification of a Complex Karyotype Signature with Clinical Implications in AML and MDS-EB Using Gene Expression Profiling
Source: MDPI journal article supplement (doi:10.3390/cancers15215289), 2023-11-04
Supplement: s1 [file s1]

**Table S1.** Diagnosis of the KUMC patients according to 2022 ICC.

|                                             | KUMC (n=47) |
|---------------------------------------------|-------------|
| AML with recurrent genetic abnormalities    | 11 (23.4)   |
| AML with mutated <i>NPM1</i>                | 8 (17.0)    |
| AML with in-frame bZIP mutated <i>CEBPA</i> | 3 (6.4)     |
| AML with mutated <i>TP53</i>                | 8 (17.0)    |
| AML with MR gene mutation                   | 11 (23.4)   |
| AML with MR cytogenetic abnormalities       | 1 (2.1)     |
| AML, NOS                                    | 5 (10.6)    |
| MDS/AML with mutated <i>TP53</i>            | 1 (2.1)     |
| MDS/AML with MR gene mutation               | 4 (8.5)     |
| MDS/AML with mutated <i>TP53</i>            | 3 (6.4)     |
| MDS with mutated <i>TP53</i>                | 3 (6.4)     |

*ICC* International Consensus Classification, *AML* Acute myeloid leukemia, *MR* myelodysplasia-related, *NOS* not otherwise specified  
*MDS* Myelodysplastic syndrome.
